# Supplementary material for: Multimodal noncontact atomic force microscopy and Kelvin probe force microscopy investigations of organolead tribromide perovskite single crystals
Source: publisher site journal article supplement (doi:10.3762/bjnano.9.161), 2018-06-07
Supplement: Additional file 1 [file 2190-4286-9-161-S1.pdf]

# Supporting Information

for

## **Multimodal noncontact atomic force microscopy and Kelvin probe force microscopy investigations of organolead tribromide perovskite single crystals**

Yann Almadori<sup>1</sup>, David Moerman<sup>2</sup>, Jaume Llacer Martinez<sup>2</sup>, Philippe Leclère<sup>2</sup>, and Benjamin Grévin<sup>\*1</sup>

Address: <sup>1</sup>Université Grenoble Alpes, CNRS, CEA, INAC-SyMMES, 38000 Grenoble, France, and <sup>2</sup>Laboratory for Chemistry of Novel Materials, Center of Innovation and Research in Materials & Polymers (CIRMAP), University of Mons, Place du Parc 20, B7000 Mons, Belgium

Email: Benjamin Grévin\* - [benjamin.grevin@cea.fr](mailto:benjamin.grevin@cea.fr)

\* Corresponding author

## Additional experimental data

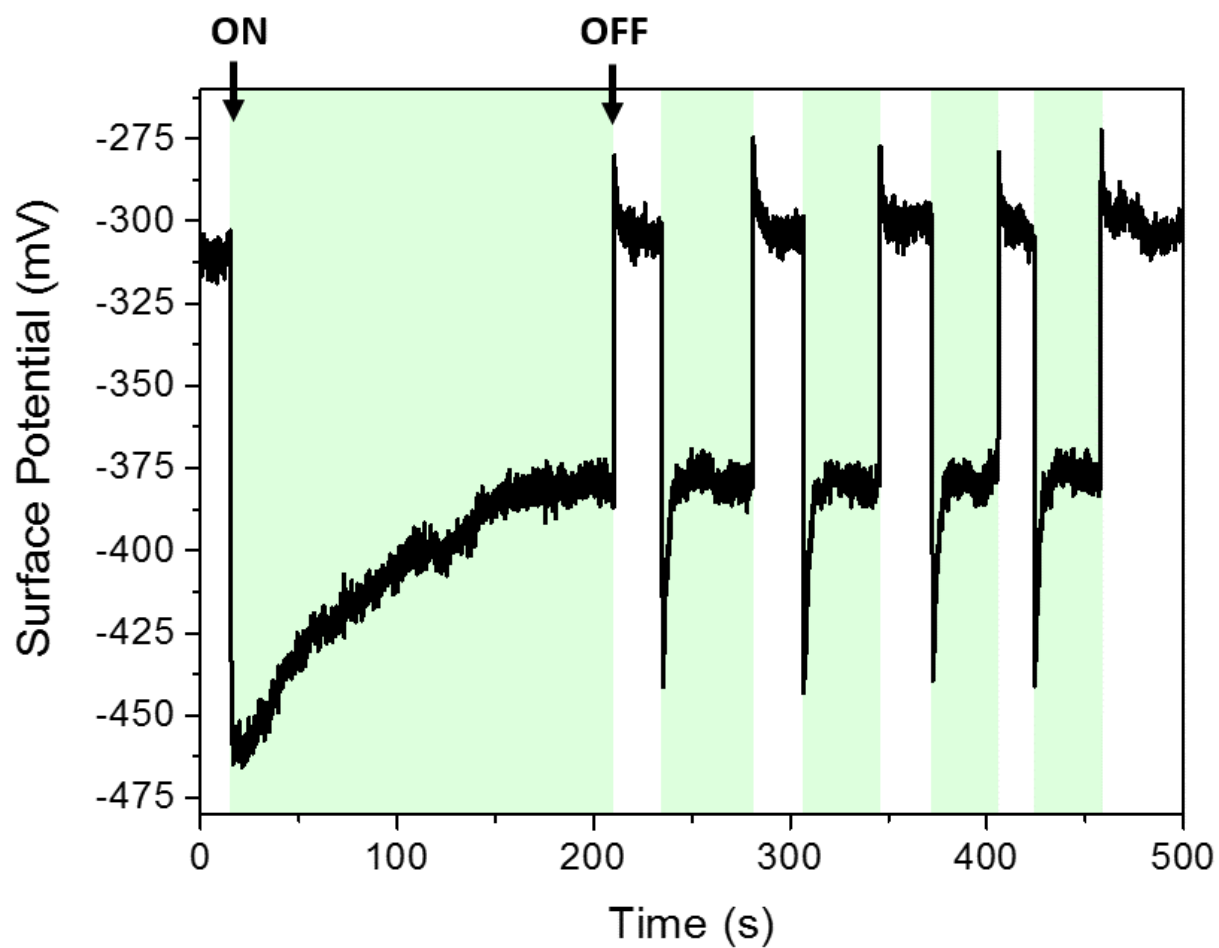

**Figure S1:** Plot of the KPFM surface potential as a function of time during five successive illumination sequences ( $\lambda = 515 \text{ nm}$ ,  $P_{\text{opt}} = 2.95 \text{ W/cm}^2$ ).

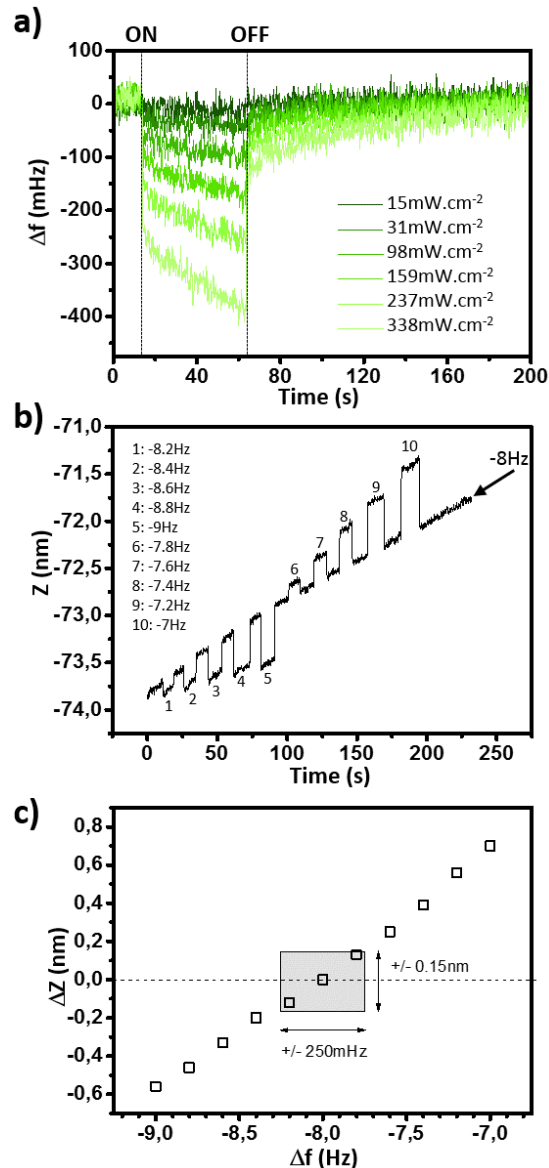

**Figure S2:** (a) Plots of the cantilever frequency shift as a function of time recorded during illumination sequences with increasing optical powers. The fast photo-response of the frequency shift is at maximum equal to 250 mHz. NB: these measurements have been performed with the tip kept at a fixed position 1  $\mu$ m away from the sample surface. (b) Tip height as a function of time. The frequency shift setpoint (-8Hz for the line base) is changed while keeping the z-regulation active. (c) Relative height change as a function of the frequency shift setpoint deduced from the data presented in b). From these data, we estimate that a frequency detuning of 250 mHz shall induce a z-artefact of 0.15 nm.

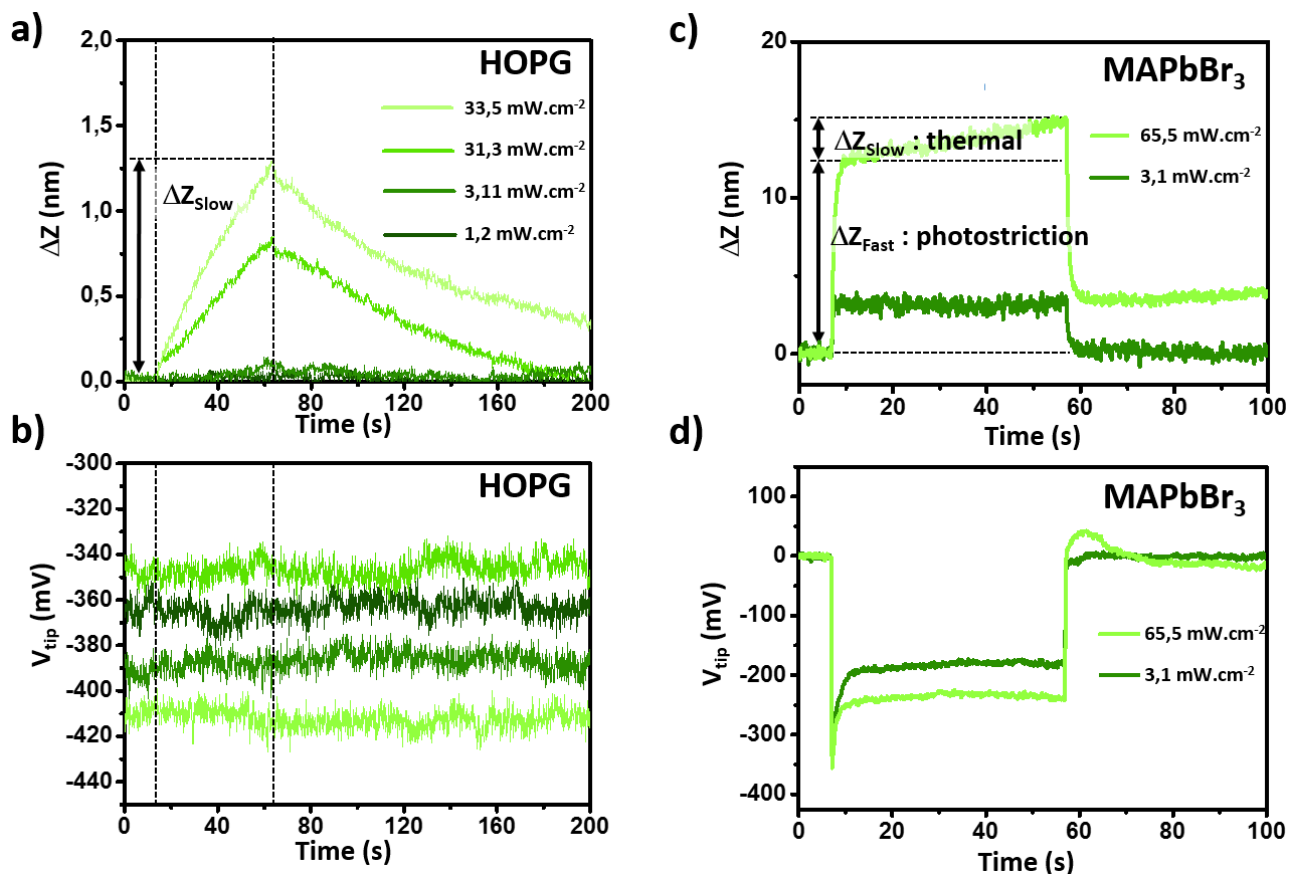

**Figure S3:** (a,b) Plots of the tip height change relative to its initial position (a) and of the KPFM surface potential (b) and as a function of time during illumination sequences ( $\lambda = 515$  nm) performed with 4 different optical powers on an HOPG substrate. (c,d) Plots of the tip height change relative to its initial position (c) and of the KPFM surface potential (d) and as a function of time during illumination sequences ( $\lambda = 515$  nm) performed with 2 different optical powers on the MAPbBr<sub>3</sub> single crystal. The curves of the surface potential have been normalized by shifting the y-values in such a way that the SP at  $t = 0$  is equal to 0 mV.

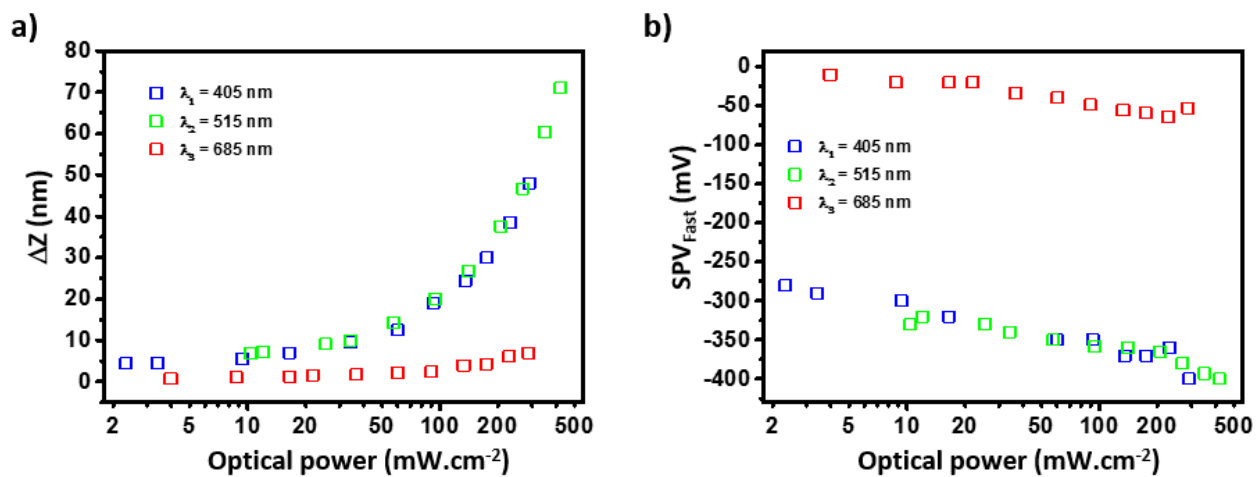

**Figure S4:** (a,b) Photostrictive signal (a) and fast component of the surface photovoltage (b) as a function of the optical power for three different wavelength.

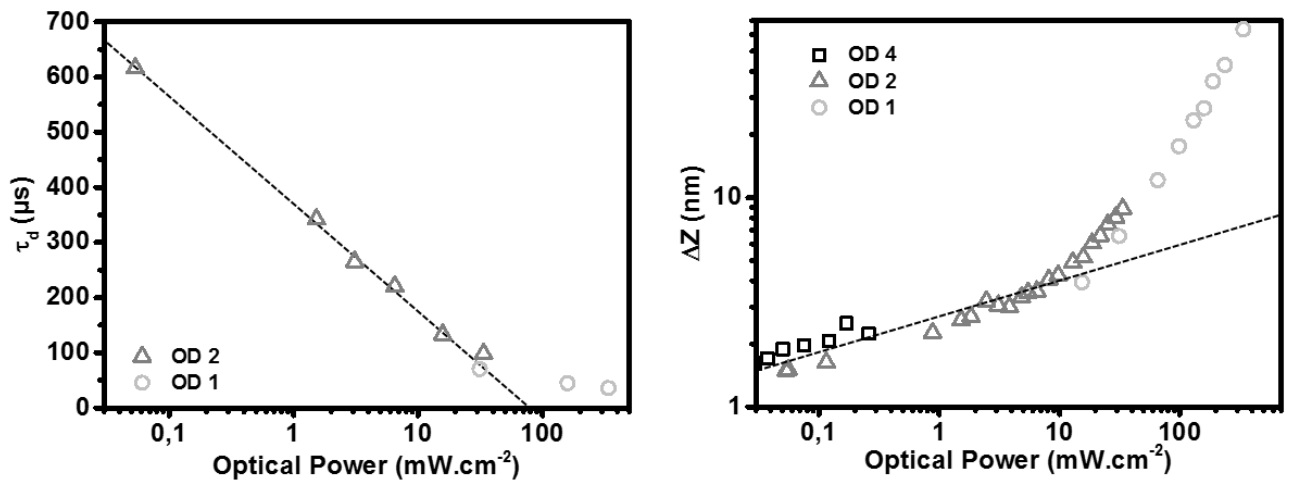

**Figure S5:** (a) SPV decay time constant measured by FMI-KPFM as a function of the optical power. (b) Photostrictive signal as a function of the optical power in log-log scale.  $\lambda = 515$  nm. The dotted lines in a) and b) are only guidelines for the eye.
